# Supplementary material for: Population Genomic Analysis of Listeria monocytogenes From Food Reveals Substrate-Specific Genome Variation
Source: Frontiers journal article supplement (doi:10.3389/fmicb.2021.620033), 2021-02-09
Supplement: Image_1.PDF [file Image_1.PDF]

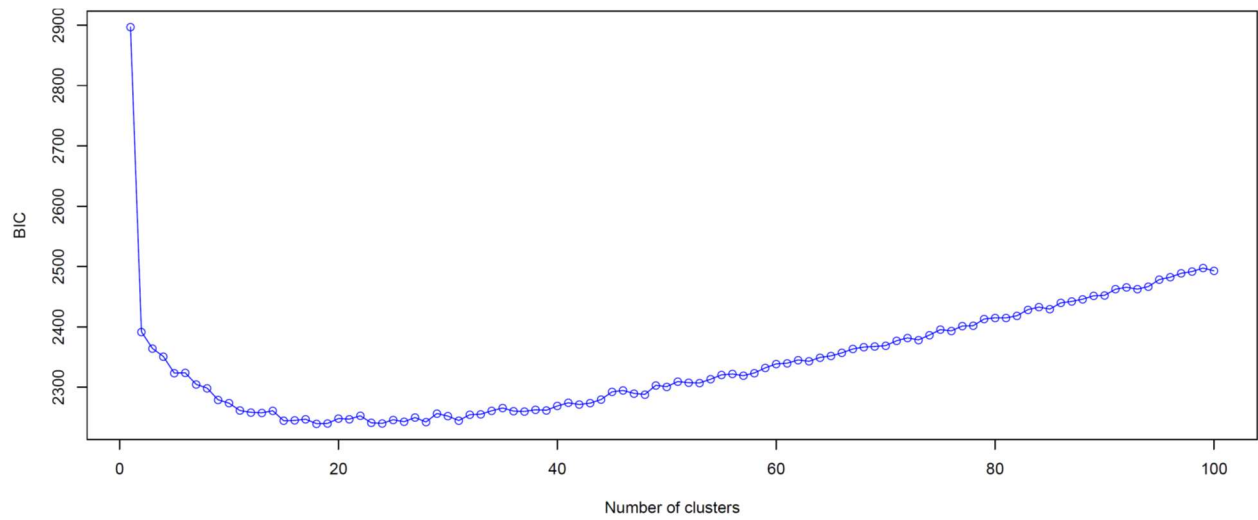

**Supplementary Figure S1. Bayesian Information Criterion values (Y-axis) across DAPC population number (X-axis).** BIC values were calculated for  $k=1-100$ .  $k=12$  corresponds to the first local minimum BIC valley.
