# Supplementary material for: Population Genomic Analysis of Listeria monocytogenes From Food Reveals Substrate-Specific Genome Variation
Source: Frontiers journal article supplement (doi:10.3389/fmicb.2021.620033), 2021-02-09
Supplement: Image_2.PDF [file Image_2.PDF]

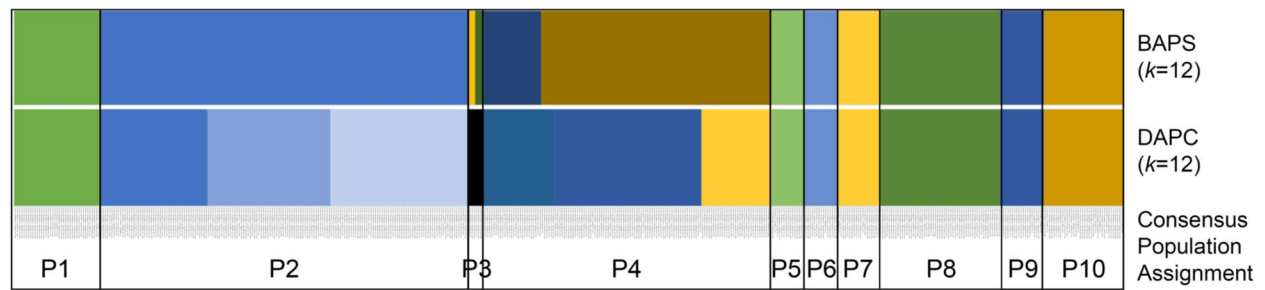

**Supplementary Figure S2. Correspondence between hierBAPS and DAPC population assignment.** Membership coefficients (Y-axis) of individuals (X-axis) between hierBAPS (top panel) and DAPC (middle panel). Most population assignments were in agreement between methods with the exception of hierBAPS populations 2, 5, and 6. hierBAPS population 2 was separated into 3 DAPC populations. hierBAPS populations 5 and 6 had contained the same isolates as DAPC populations 6 and 7 but were assigned differently across the 2 populations. The consensus population between hierBAPS and DAPC are labeled on the bottom panel.
